# Supplementary material
Source: publisher figshare collection journal article supplement (https://gsapubs.figshare.com/ndownloader/files/22746518)
Supplement: Supplementary file 1 [file 22746518]

## GSA REPOSITORY ITEM

### METHODS

Pb isotopic analyses, regardless of introduction method, were conducted on the VG Axiom magnetic sector, multicollector ICP-MS at the Geological Institute, University of Copenhagen. All analyses employed static measurement mode with all Pb isotopes measured by Faraday detectors. Samples were crushed and processed by standard mineral separation methods, including Wilfley table, sieving (200-500  $\mu\text{m}$ ) and heavy liquids of appropriate density. All regressions were calculated using Isoplot/Ex (Ludwig, 1999).

***Laser ablation methods:*** Laser ablation of K-feldspar in grain mounts and rock slabs utilized a Cetac LSX-200 266 nm wavelength laser system. Mass spectrometer settings and Ar carrier gas flow rates were adjusted at the start of each session for maximum intensity of Pb 208 while analyzing NIST 610 by laser ablation. Data was acquired in 50 scans of 1 second duration. Mass fractionation during analyses of unknowns was determined by monitoring Pb and Tl in bracketing analyses of NIST 610 (with an average of 2 NIST 610 analyses for every 3 unknowns; Fig. DR1 and Table DR1).

A pre-ablation pass to remove surface contamination along the line to be analyzed used a ca. 300  $\mu\text{m}$  spot size. Laser spot sizes of 100  $\mu\text{m}$  and 200  $\mu\text{m}$  were utilized for analyses of Kfs in grain mounts and rock slabs, respectively. Line lengths and laser tracking speed were dictated by grain size and were approximately matched with that of bracketing analyses of standard glass NIST 610. Results with 2SE errors are presented in Table DR2 and Figure DR2.

***Laser ablation of epoxy mounted Kfs:*** Kfs grains free of obvious inclusions were selected using a binocular reflected-light microscope from mineral separates of appropriate density, placed on two-sided tape, collared, and covered with low-Pb epoxy. The grains in the resulting puck were ground and polished to approximately two thirds of their original thickness prior to analyses by LA-ICP-MS.

*Laser ablation of Kfs in rock slabs:* Rock slabs were cut using a standard water-cooled rock saw, polished and rinsed with de-ionized water. Polished surfaces of slabs were impregnated with a low-Pb epoxy and re-polished to re-expose grains through the epoxy. Reducing the intergranular permeability of the polished surface proved necessary for the subsequent staining procedure. The polished surfaces were etched at room temperature by HF vapor for 30-45 seconds and then treated for 2-5 minutes by a solution of sodium cobaltinitrate to stain Kfs yellow. With Kfs now readily identifiable, grains were selected and scribed using a binocular microscope. This method of sample preparation and grain selection proved far more rapid than preparing epoxy-mounted mineral separates but resulted in slightly less efficient analytical sessions. This is due to Kfs in some slabs containing optically undetectable apatite inclusions with different Pb isotopic compositions than that of Kfs, which caused severe inflation of errors on the  $^{206}\text{Pb}/^{204}\text{Pb}$  ratios. P was monitored during the pre-ablation pass to detect apatite inclusions. Samples with unavoidable apatite inclusions in Kfs were abandoned.

***Solution methods:*** Solution analyses were conducted on a subset of five Kfs fractions to test for systematic differences between LA and total digestion solution methods (Fig. DR3). Fractions for solution analyses were optically selected from mineral separates of appropriate density, treated with warm 2N HCl for 1 hour, dissolved with HF:HNO<sub>3</sub> after which Pb was separated by standard HBr chemical methods. The natural isotopic composition of Pb was determined in static Faraday mode using 150 scans of 1 second duration. A  $^{207}\text{Pb}$ - $^{204}\text{Pb}$  double spike was subsequently added and the samples re-analyzed (100 scans of 1 second duration) to determine mass fractionation and obtain higher precision isotopic data (ca. +/-100 ppm; Baker et al., 2004). The SRM-981 standard was run by the double spike method at the beginning of the session. The procedural blank is estimated to be 80 pg.

## **REFERENCES FOR DATA REPOSITORY**

- Baker, J., Peate, D., Waight, T., and Meyzen, C., 2004, Pb isotopic analysis of standards and samples using a  $^{207}\text{Pb}/^{204}\text{Pb}$  double spike and thallium to correct for mass bias with a double focusing MC-ICP-MS. *Chemical Geology*, v. 211, p. 275-303.
- Ludwig, K.R., 1999. Isoplot/Ex version 2.00 – A geochronological toolkit for Microsoft Excel. Berkeley Geochronology Center, Special Publication No. 2.

## **FIGURES FOR GSA REPOSITORY**

Figure DR1. Uranogenic Pb isotopic compositions of standard glass NIST 610 analyzed during this study. Thick error bars reflect 2SE of all standard data. Black box near center of diagram represent three analyses of NIST 610 by double spike solution ICP-MS at the Geological Institute, University of Copenhagen.

Figure DR2. Uranogenic Pb isotopic compositions of K-feldspar from Archean orthogneisses from the Nagssugtoqidian-Rinkian orogen. Dashed box in A defines extent of graph in B.

Figure DR3. Uranogenic Pb isotopic compositions of five K-feldspar unknowns from Archean orthogneisses as determined by both laser ablation (L) and solution (S) ICP-MS.

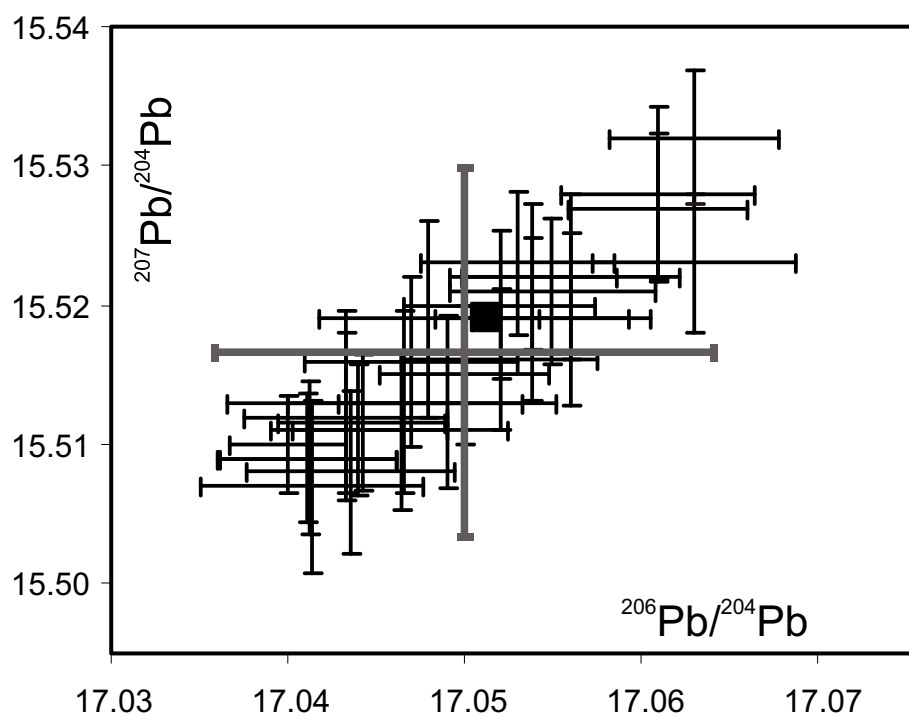

Figure DR1

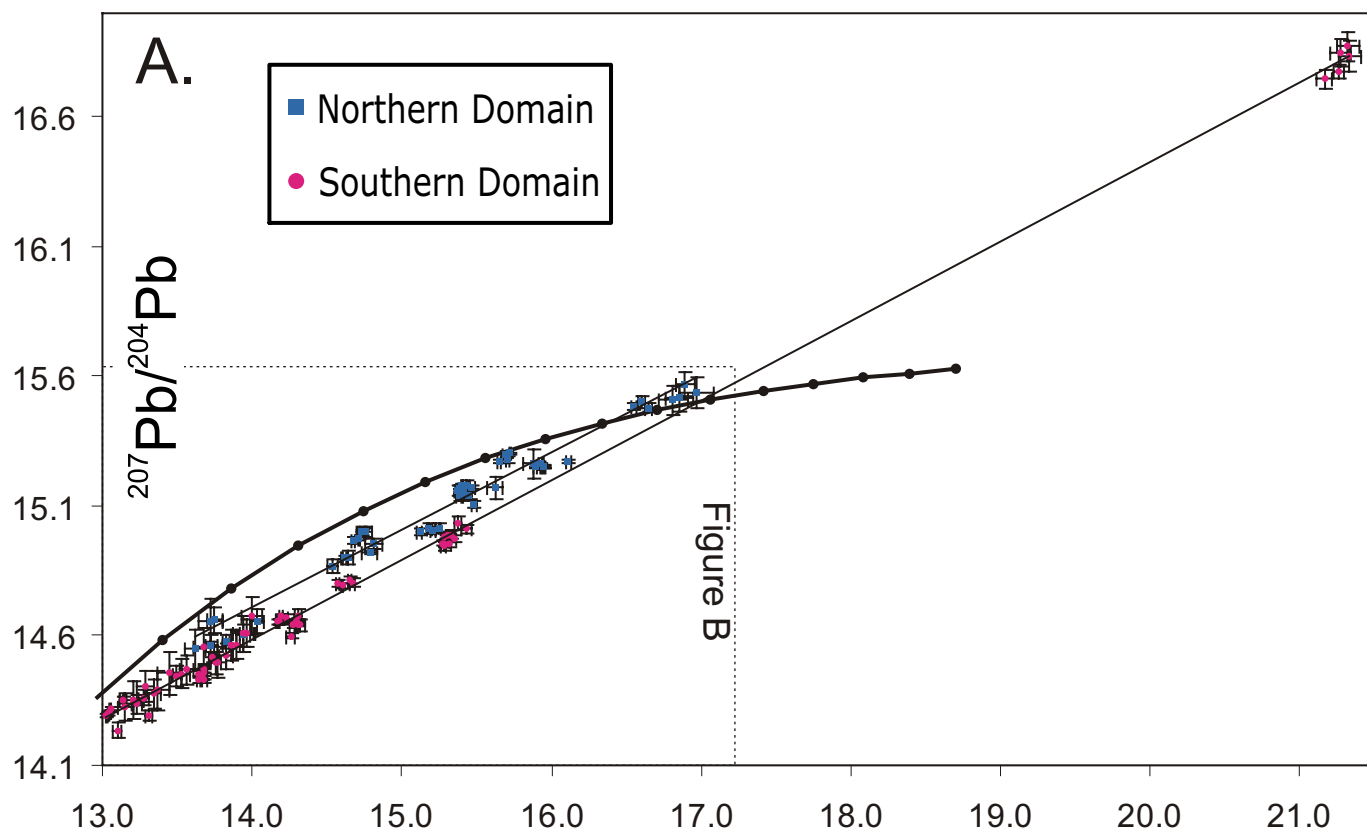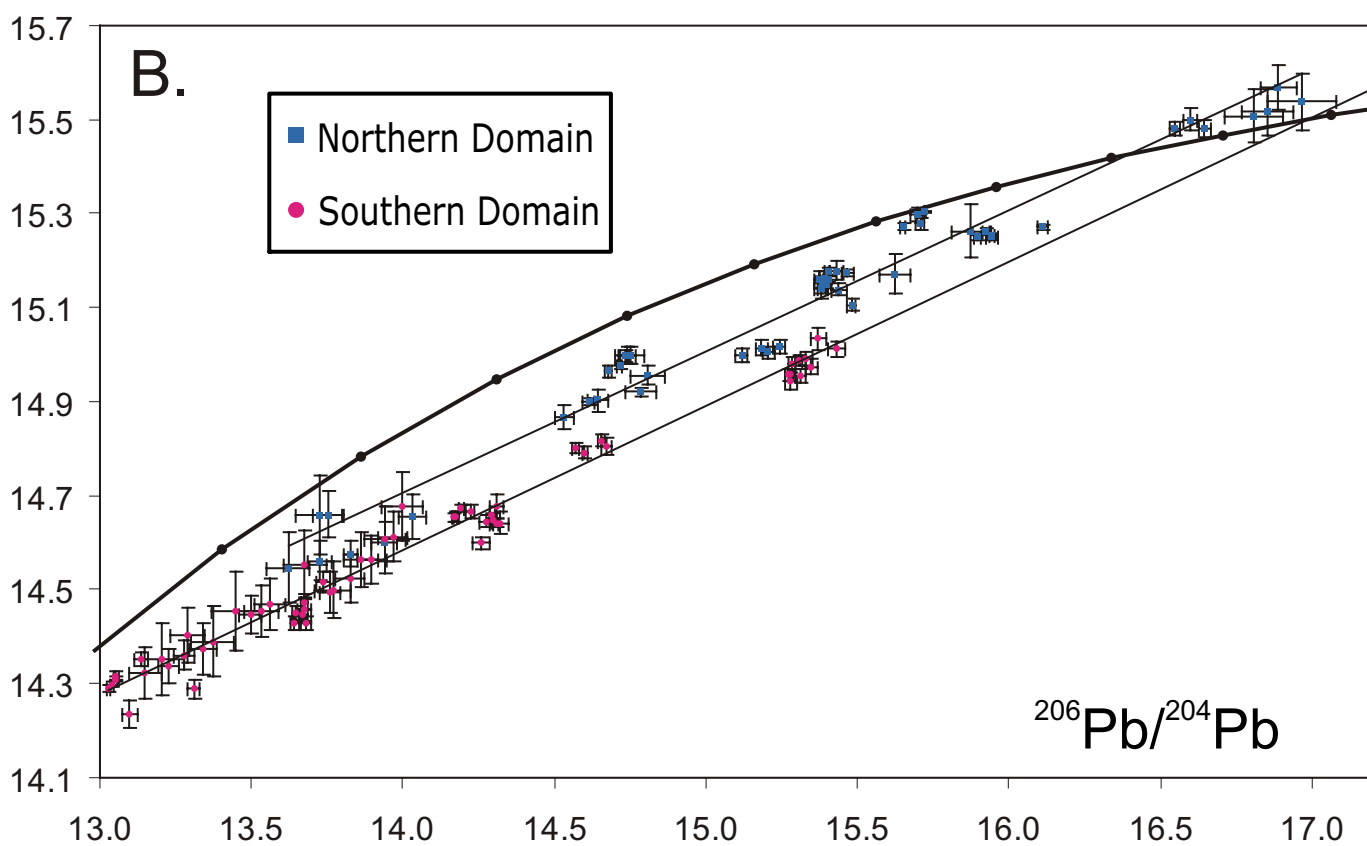

NB: DATA POINTS ARE IN COLOR

Figure DR2

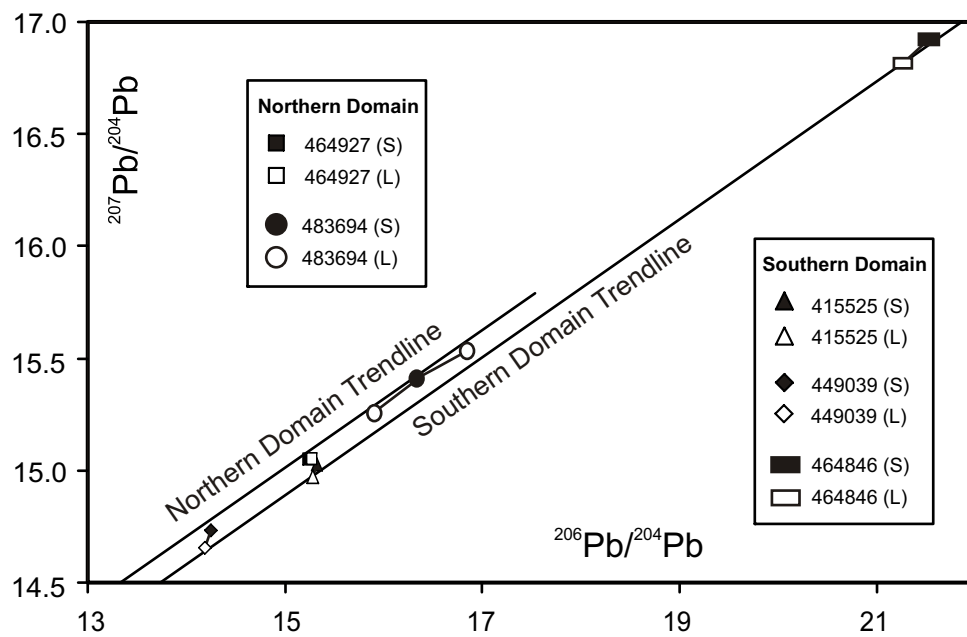

Figure DR3

**Table DR1. Isotopic composition of NIST 610 glass**

| $^{206}\text{Pb}/^{204}\text{Pb}^1$ | 2SE% <sup>2</sup> | $^{207}\text{Pb}/^{204}\text{Pb}^1$ | 2SE% <sup>2</sup> |
|-------------------------------------|-------------------|-------------------------------------|-------------------|
| 17.040                              | 0.019             | 15.505                              | 0.022             |
| 17.041                              | 0.037             | 15.502                              | 0.040             |
| 17.041                              | 0.030             | 15.504                              | 0.030             |
| 17.047                              | 0.039             | 15.508                              | 0.042             |
| 17.043                              | 0.039             | 15.508                              | 0.042             |
| 17.046                              | 0.036             | 15.506                              | 0.037             |
| 17.044                              | 0.028             | 15.507                              | 0.031             |
| 17.041                              | 0.029             | 15.504                              | 0.035             |
| 17.043                              | 0.034             | 15.507                              | 0.039             |
| 17.053                              | 0.032             | 15.518                              | 0.033             |
| 17.047                              | 0.036             | 15.511                              | 0.039             |
| 17.052                              | 0.032             | 15.511                              | 0.033             |
| 17.044                              | 0.034             | 15.503                              | 0.037             |
| 17.044                              | 0.029             | 15.506                              | 0.031             |
| 17.048                              | 0.036             | 15.514                              | 0.045             |
| 17.054                              | 0.028             | 15.517                              | 0.034             |
| 17.061                              | 0.032             | 15.523                              | 0.040             |
| 17.054                              | 0.032             | 15.514                              | 0.038             |
| 17.049                              | 0.036             | 15.508                              | 0.040             |
| 17.056                              | 0.027             | 15.514                              | 0.040             |
| 17.050                              | 0.028             | 15.510                              | 0.032             |
| 17.063                              | 0.034             | 15.518                              | 0.032             |
| 17.055                              | 0.034             | 15.516                              | 0.034             |
| 17.052                              | 0.032             | 15.515                              | 0.034             |
| 17.056                              | 0.036             | 15.517                              | 0.038             |
| 17.061                              | 0.030             | 15.522                              | 0.034             |
| 17.063                              | 0.028             | 15.527                              | 0.031             |

**Notes**

1. Corrected for mass fractionation by simultaneous measurement of Tl.
2. 2SE% errors.



Table DR2. Isotopic composition of K-feldspar unknowns.

| No. <sup>1</sup>       | GEUS # <sup>2</sup> | <sup>206</sup> Pb/ <sup>204</sup> Pb <sup>3</sup> | 2SE% <sup>4</sup> | <sup>207</sup> Pb/ <sup>204</sup> Pb <sup>3</sup> | 2SE% <sup>4</sup> | <sup>208</sup> Pb/ <sup>204</sup> Pb <sup>3</sup> | 2SE% <sup>4</sup> | Method <sup>5</sup> |
|------------------------|---------------------|---------------------------------------------------|-------------------|---------------------------------------------------|-------------------|---------------------------------------------------|-------------------|---------------------|
| <b>NORTHERN DOMAIN</b> |                     |                                                   |                   |                                                   |                   |                                                   |                   |                     |
| 1                      | 481669              | 15.382                                            | 0.089             | 15.143                                            | 0.075             | 34.751                                            | 0.033             | slab                |
| 1                      | 481669              | 15.376                                            | 0.111             | 15.158                                            | 0.120             | 34.812                                            | 0.055             | slab                |
| 1                      | 481669              | 15.391                                            | 0.094             | 15.164                                            | 0.097             | 34.819                                            | 0.046             | slab                |
| 1                      | 481669              | 15.432                                            | 0.145             | 15.179                                            | 0.132             | 34.892                                            | 0.070             | slab                |
| 1                      | 481669              | 15.381                                            | 0.137             | 15.141                                            | 0.148             | 34.806                                            | 0.066             | slab                |
| 2                      | 481636              | 15.707                                            | 0.094             | 15.278                                            | 0.093             | 37.888                                            | 0.043             | slab                |
| 2                      | 481636              | 15.650                                            | 0.047             | 15.273                                            | 0.042             | 37.661                                            | 0.023             | slab                |
| 2                      | 481636              | 15.696                                            | 0.118             | 15.297                                            | 0.096             | 37.736                                            | 0.054             | slab                |
| 3                      | 481733              | 14.679                                            | 0.077             | 14.965                                            | 0.083             | 34.521                                            | 0.040             | slab                |
| 3                      | 481733              | 14.715                                            | 0.050             | 14.976                                            | 0.043             | 34.557                                            | 0.022             | slab                |
| 3                      | 481733              | 14.732                                            | 0.087             | 14.997                                            | 0.079             | 34.640                                            | 0.043             | slab                |
| 4                      | 483641              | 15.723                                            | 0.015             | 15.304                                            | 0.015             | 35.393                                            | 0.021             | soln                |
| 5                      | 489405              | 15.401                                            | 0.042             | 15.177                                            | 0.050             | 35.071                                            | 0.022             | slab                |
| 5                      | 489405              | 15.387                                            | 0.046             | 15.152                                            | 0.050             | 35.018                                            | 0.022             | slab                |
| 5                      | 489405              | 15.382                                            | 0.050             | 15.158                                            | 0.050             | 35.001                                            | 0.024             | slab                |
| 5                      | 489405              | 15.467                                            | 0.132             | 15.174                                            | 0.048             | 35.047                                            | 0.024             | slab                |
| 5                      | 489405              | 15.396                                            | 0.036             | 15.148                                            | 0.036             | 34.997                                            | 0.017             | slab                |
| 5                      | 489405              | 15.404                                            | 0.028             | 15.161                                            | 0.036             | 35.021                                            | 0.014             | slab                |
| 6                      | 483656              | 13.725                                            | 0.580             | 14.659                                            | 0.577             | 34.846                                            | 0.294             | mount               |
| 6                      | 483656              | 13.727                                            | 0.298             | 14.561                                            | 0.286             | 34.716                                            | 0.143             | mount               |
| 6                      | 483656              | 13.751                                            | 0.340             | 14.661                                            | 0.342             | 34.951                                            | 0.175             | mount               |
| 6                      | 483656              | 13.621                                            | 0.523             | 14.547                                            | 0.521             | 34.610                                            | 0.254             | mount               |
| 7                      | 483665              | 14.533                                            | 0.225             | 14.869                                            | 0.170             | 33.518                                            | 0.087             | mount               |
| 7                      | 483665              | 14.643                                            | 0.227             | 14.902                                            | 0.165             | 33.615                                            | 0.079             | mount               |
| 7                      | 483665              | 14.808                                            | 0.394             | 14.957                                            | 0.136             | 33.820                                            | 0.076             | mount               |
| 7                      | 483665              | 14.614                                            | 0.140             | 14.900                                            | 0.046             | 33.580                                            | 0.024             | slab                |
| 7                      | 483665              | 14.786                                            | 0.336             | 14.921                                            | 0.060             | 33.673                                            | 0.048             | slab                |
| 7                      | 483665              | 14.739                                            | 0.200             | 14.999                                            | 0.120             | 33.877                                            | 0.065             | slab                |
| 7                      | 483665              | 14.750                                            | 0.320             | 15.000                                            | 0.120             | 33.874                                            | 0.070             | slab                |
| 8                      | 483686              | 13.826                                            | 0.173             | 14.575                                            | 0.187             | 34.371                                            | 0.088             | mount               |
| 8                      | 483686              | 13.939                                            | 0.307             | 14.601                                            | 0.289             | 34.516                                            | 0.140             | mount               |
| 8                      | 483686              | 14.032                                            | 0.316             | 14.656                                            | 0.321             | 34.733                                            | 0.155             | mount               |
| 9                      | 483694              | 15.623                                            | 0.331             | 15.172                                            | 0.283             | 35.046                                            | 0.155             | mount               |
| 9                      | 483694              | 16.966                                            | 0.671             | 15.539                                            | 0.388             | 35.066                                            | 0.271             | mount               |
| 9                      | 483694              | 16.854                                            | 0.520             | 15.516                                            | 0.320             | 34.789                                            | 0.210             | mount               |
| 9                      | 483694              | 16.891                                            | 0.360             | 15.569                                            | 0.300             | 34.965                                            | 0.150             | mount               |
| 9                      | 483694              | 16.809                                            | 0.580             | 15.508                                            | 0.360             | 35.208                                            | 0.187             | mount               |
| 9                      | 483694              | 15.874                                            | 0.388             | 15.263                                            | 0.366             | 34.944                                            | 0.187             | mount               |
| 9                      | 483694              | 16.111                                            | 0.118             | 15.272                                            | 0.034             | 34.908                                            | 0.026             | slab                |

|    |        |        |       |        |       |        |       |      |
|----|--------|--------|-------|--------|-------|--------|-------|------|
| 9  | 483694 | 15.944 | 0.047 | 15.253 | 0.030 | 34.708 | 0.017 | slab |
| 9  | 483694 | 15.927 | 0.096 | 15.262 | 0.039 | 34.811 | 0.032 | slab |
| 9  | 483694 | 15.896 | 0.072 | 15.250 | 0.034 | 34.730 | 0.020 | slab |
| 9  | 483694 | 15.943 | 0.128 | 15.250 | 0.033 | 34.746 | 0.024 | slab |
| 9  | 483694 | 16.357 | 0.031 | 15.413 | 0.032 | 34.724 | 0.014 | soln |
| 10 | 464927 | 15.208 | 0.120 | 15.005 | 0.085 | 34.249 | 0.048 | slab |
| 10 | 464927 | 15.438 | 0.169 | 15.139 | 0.091 | 34.756 | 0.058 | slab |
| 10 | 464927 | 15.480 | 0.098 | 15.106 | 0.079 | 34.651 | 0.048 | slab |
| 10 | 464927 | 15.117 | 0.121 | 14.998 | 0.090 | 34.254 | 0.053 | slab |
| 10 | 464927 | 15.244 | 0.131 | 15.017 | 0.106 | 34.270 | 0.058 | slab |
| 10 | 464927 | 15.183 | 0.127 | 15.014 | 0.112 | 34.233 | 0.051 | slab |
| 10 | 464927 | 15.253 | 0.033 | 15.048 | 0.033 | 34.248 | 0.015 | soln |
| 11 | 464932 | 16.601 | 0.137 | 15.501 | 0.144 | 33.628 | 0.073 | slab |
| 11 | 464932 | 16.647 | 0.123 | 15.480 | 0.121 | 33.564 | 0.062 | slab |
| 11 | 464932 | 16.549 | 0.093 | 15.481 | 0.090 | 33.585 | 0.046 | slab |

# SOUTHERN DOMAIN

|    |        |        |       |        |       |        |       |       |
|----|--------|--------|-------|--------|-------|--------|-------|-------|
| 12 | 464941 | 13.769 | 0.443 | 14.499 | 0.416 | 34.096 | 0.198 | slab  |
| 12 | 464941 | 13.758 | 0.250 | 14.494 | 0.301 | 34.285 | 0.132 | slab  |
| 12 | 464941 | 13.826 | 0.348 | 14.522 | 0.351 | 34.311 | 0.166 | slab  |
| 12 | 464941 | 13.736 | 0.175 | 14.518 | 0.147 | 34.185 | 0.088 | slab  |
| 13 | 464945 | 13.138 | 0.169 | 14.352 | 0.094 | 33.779 | 0.087 | slab  |
| 13 | 464945 | 13.028 | 0.046 | 14.291 | 0.052 | 33.180 | 0.023 | slab  |
| 13 | 464945 | 13.040 | 0.032 | 14.299 | 0.034 | 33.217 | 0.019 | slab  |
| 13 | 464945 | 13.050 | 0.042 | 14.309 | 0.037 | 33.283 | 0.025 | slab  |
| 13 | 464945 | 13.053 | 0.058 | 14.317 | 0.056 | 33.316 | 0.026 | slab  |
| 14 | 484450 | 13.277 | 0.257 | 14.361 | 0.222 | 35.089 | 0.118 | mount |
| 14 | 484450 | 13.098 | 0.196 | 14.235 | 0.200 | 34.586 | 0.100 | mount |
| 14 | 484450 | 13.227 | 0.244 | 14.337 | 0.261 | 34.817 | 0.126 | mount |
| 15 | 449045 | 13.532 | 0.416 | 14.454 | 0.386 | 33.470 | 0.200 | mount |
| 15 | 449045 | 13.676 | 0.510 | 14.554 | 0.498 | 33.743 | 0.247 | mount |
| 15 | 449045 | 13.561 | 0.363 | 14.470 | 0.383 | 33.475 | 0.186 | mount |
| 15 | 449045 | 13.310 | 0.150 | 14.289 | 0.140 | 33.018 | 0.067 | mount |
| 16 | 449054 | 13.497 | 0.264 | 14.447 | 0.273 | 34.084 | 0.125 | mount |
| 16 | 449054 | 13.339 | 0.354 | 14.375 | 0.378 | 34.030 | 0.187 | mount |
| 16 | 449054 | 13.447 | 0.586 | 14.456 | 0.582 | 34.091 | 0.284 | mount |
| 16 | 449054 | 13.372 | 0.524 | 14.389 | 0.518 | 33.982 | 0.246 | mount |
| 17 | 415539 | 13.967 | 0.356 | 14.613 | 0.364 | 35.030 | 0.185 | mount |
| 17 | 415539 | 13.861 | 0.402 | 14.564 | 0.412 | 34.830 | 0.195 | mount |
| 17 | 415539 | 13.998 | 0.500 | 14.678 | 0.500 | 35.159 | 0.250 | mount |
| 17 | 415539 | 13.940 | 0.480 | 14.607 | 0.491 | 35.189 | 0.236 | mount |
| 17 | 415539 | 13.898 | 0.345 | 14.564 | 0.353 | 35.120 | 0.176 | mount |
| 18 | 415525 | 15.281 | 0.118 | 14.945 | 0.122 | 33.888 | 0.057 | mount |
| 18 | 415525 | 15.312 | 0.110 | 14.955 | 0.106 | 33.935 | 0.053 | mount |

|    |        |        |       |        |       |        |       |       |
|----|--------|--------|-------|--------|-------|--------|-------|-------|
| 18 | 415525 | 15.273 | 0.080 | 14.957 | 0.082 | 33.881 | 0.041 | mount |
| 18 | 415525 | 15.284 | 0.068 | 14.981 | 0.082 | 33.950 | 0.033 | mount |
| 18 | 415525 | 15.308 | 0.066 | 14.987 | 0.068 | 33.962 | 0.033 | mount |
| 18 | 415525 | 15.331 | 0.033 | 15.023 | 0.033 | 33.990 | 0.015 | soln  |
| 19 | 464402 | 13.674 | 0.100 | 14.473 | 0.112 | 35.233 | 0.054 | mount |
| 19 | 464402 | 13.676 | 0.174 | 14.457 | 0.160 | 35.205 | 0.087 | mount |
| 19 | 464402 | 13.681 | 0.110 | 14.430 | 0.100 | 35.415 | 0.158 | mount |
| 19 | 464402 | 13.648 | 0.096 | 14.451 | 0.096 | 35.134 | 0.055 | mount |
| 19 | 464402 | 13.670 | 0.096 | 14.446 | 0.090 | 34.998 | 0.050 | mount |
| 19 | 464402 | 13.642 | 0.100 | 14.429 | 0.094 | 35.392 | 0.088 | mount |
| 20 | 449047 | 13.289 | 0.427 | 14.404 | 0.408 | 33.689 | 0.207 | mount |
| 20 | 449047 | 13.205 | 0.536 | 14.352 | 0.527 | 33.822 | 0.261 | mount |
| 20 | 449047 | 13.150 | 0.399 | 14.323 | 0.372 | 33.550 | 0.196 | mount |
| 21 | 464846 | 21.274 | 0.320 | 16.850 | 0.315 | 35.509 | 0.161 | mount |
| 21 | 464846 | 21.318 | 0.348 | 16.871 | 0.345 | 35.531 | 0.175 | mount |
| 21 | 464846 | 21.333 | 0.363 | 16.834 | 0.363 | 35.407 | 0.182 | mount |
| 21 | 464846 | 21.260 | 0.160 | 16.774 | 0.162 | 35.274 | 0.079 | mount |
| 21 | 464846 | 21.164 | 0.232 | 16.747 | 0.220 | 35.266 | 0.110 | mount |
| 21 | 464846 | 21.540 | 0.023 | 16.918 | 0.030 | 35.543 | 0.014 | soln  |
| 22 | 449071 | 14.656 | 0.080 | 14.817 | 0.086 | 35.593 | 0.040 | mount |
| 22 | 449071 | 14.673 | 0.108 | 14.805 | 0.120 | 35.579 | 0.056 | mount |
| 22 | 449071 | 14.601 | 0.070 | 14.792 | 0.084 | 35.580 | 0.037 | mount |
| 22 | 449071 | 14.570 | 0.078 | 14.802 | 0.077 | 35.598 | 0.039 | mount |
| 23 | 449039 | 14.170 | 0.054 | 14.654 | 0.056 | 34.453 | 0.027 | mount |
| 23 | 449039 | 14.176 | 0.076 | 14.654 | 0.078 | 34.453 | 0.038 | mount |
| 23 | 449039 | 14.191 | 0.056 | 14.674 | 0.046 | 34.495 | 0.028 | mount |
| 23 | 449039 | 14.234 | 0.035 | 14.715 | 0.034 | 34.576 | 0.014 | soln  |
| 24 | 415551 | 15.330 | 0.128 | 14.990 | 0.100 | 34.011 | 0.050 | mount |
| 24 | 415551 | 15.372 | 0.170 | 15.034 | 0.164 | 34.090 | 0.083 | mount |
| 24 | 415551 | 15.278 | 0.090 | 14.957 | 0.088 | 33.913 | 0.041 | mount |
| 24 | 415551 | 15.432 | 0.196 | 15.012 | 0.116 | 33.984 | 0.065 | mount |
| 24 | 415551 | 15.347 | 0.132 | 14.974 | 0.106 | 34.073 | 0.059 | mount |
| 25 | 484438 | 14.310 | 0.158 | 14.677 | 0.167 | 34.629 | 0.100 | slab  |
| 25 | 484438 | 14.309 | 0.057 | 14.642 | 0.056 | 34.627 | 0.028 | slab  |
| 25 | 484438 | 14.295 | 0.079 | 14.647 | 0.047 | 34.531 | 0.037 | slab  |
| 25 | 484438 | 14.294 | 0.047 | 14.657 | 0.035 | 34.588 | 0.026 | slab  |
| 25 | 484438 | 14.222 | 0.102 | 14.667 | 0.105 | 34.532 | 0.052 | slab  |

## Notes

1. Sample numbers used in text and Figure 1.
2. Geological Survey of Denmark and Greenland catalogue numbers.
3. Isotopic ratio corrected for blank and mass fractionation.
4. 2 standard error of the mean expressed as percent error.
5. Mount = analyses of hand picked K-feldspar grains in an epoxy mount;  
    Slab = analyses of K-feldspar in cut rock slab;  
    Soln = analyses of dissolved K-feldspar by solution.
